# Supplementary material for: Experimental Characterization of Screw-Extruded Carbon Fibre-Reinforced Polyamide: Design for Aeronautical Mould Preforms with Multiphysics Computational Guidance
Source: MDPI journal article supplement (doi:10.3390/jmmp8010034), 2024-02-09
Supplement: s1 [file s1]

# Bergamid™ B70 KF20 Black

Avient Corporation - Polyamide 6

Wednesday, March 23, 2022

## General Information

### General

|                        |                                      |
|------------------------|--------------------------------------|
| Generic Name           | • Polyamide 6 (Nylon 6)              |
| Material Status        | • Developmental                      |
| Availability           | • Europe                             |
| Filler / Reinforcement | • Carbon Fiber, 20% Filler by Weight |
| Appearance             | • Black                              |
| Forms                  | • Pellets                            |
| Processing Method      | • Injection Molding                  |

## ASTM & ISO Properties<sup>1</sup>

| Physical                                                  | Nominal Value | Unit | Test Method |
|-----------------------------------------------------------|---------------|------|-------------|
| Density / Specific Gravity                                | 1.21 to 1.25  |      | ISO 1183    |
| Mechanical                                                | Nominal Value | Unit | Test Method |
| Tensile Modulus                                           | > 13800       | MPa  | ISO 527-1   |
| Tensile Stress                                            | 220           | MPa  | ISO 527-2   |
| Tensile Strain (Break)                                    | 1.0 to 3.0    | %    | ISO 527-2   |
| Flexural Stress                                           | 345           | MPa  | ISO 178     |
| Impact                                                    | Nominal Value | Unit | Test Method |
| Charpy Unnotched Impact Strength (23°C)                   | No Break      |      | ISO 179     |
| Thermal                                                   | Nominal Value | Unit | Test Method |
| Deflection Temperature Under Load<br>0.45 MPa, Unannealed | 221           | °C   | ISO 75-2/B  |
| Deflection Temperature Under Load<br>1.8 MPa, Unannealed  | 216           | °C   | ISO 75-2/A  |
| Melting Temperature (DSC)                                 | 215 to 225    | °C   | ISO 3146    |

## Processing Information

| Injection              | Nominal Value | Unit |
|------------------------|---------------|------|
| Drying Temperature     | 80            | °C   |
| Drying Time            | 3.0 to 4.0    | hr   |
| Processing (Melt) Temp | 260 to 290    | °C   |
| Mold Temperature       | 50 to 90      | °C   |

### Notes

<sup>1</sup> Typical properties: these are not to be construed as specifications.
